# Supplementary material
Source: MDPI journal article supplement (https://www.mdpi.com/2311-7524/7/9/326)
Supplement: s1 [file s1]

**Figure S1.** Full scan on a HPLC-MS, and the phenolic compounds identified for *J. regia* leaves.

RT: 5.97 - 29.96

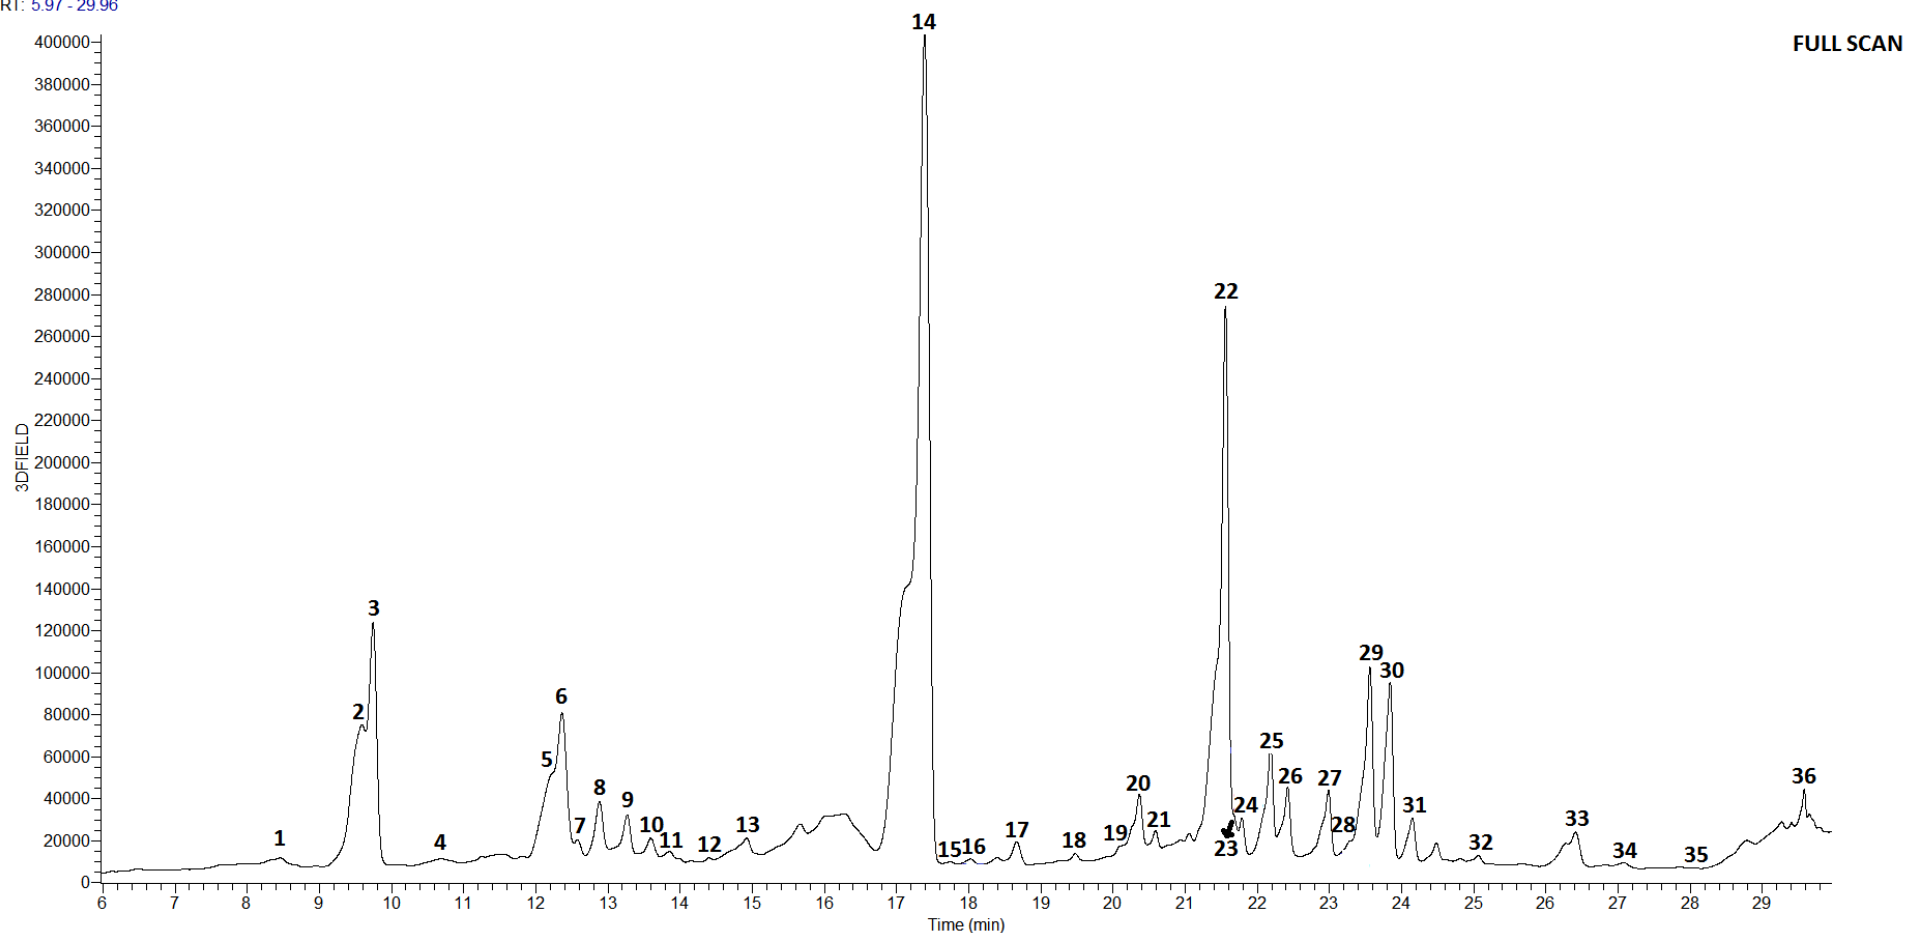

**1**= Epigallocatechin; **2**= Procyanidin dimer 1; **3**= Neochlorogenic acid (3-caffeoylquinic acid); **4**= Procyanidin dimer 2; **5**= Procyanidin dimer 3; **6**=3-*p*-Coumaroylquinic acid; **7**= Cryptochlorogenic acid (4-caffeoylquinic acid); **8**=(+)-Catechin; **9**= Dihydroxytetralone hexoside; **10**= Hydrojuglone derivative 1; **11**= Chlorogenic acid (5-caffeoylquinic acid); **12**= Hydrojuglone hexoside derivative 1; **13**=5-Hydroxy-2,3-dihydro-1,4-naphthalenedione; **14**= Hydrojuglone- $\beta$ -D-glucopyranoside; **15**= Myricetin-3-galactoside; **16**= Hydrojuglone derivative 2; **17**= Hydrojuglone derivative pentoside 1; **18**= Tetralone hexoside; **19**= Myricetin-3-rhamnoside; **20**= Quercetin-3-galactoside; **21**= Quercetin-3-glucoside; **22**= Hydrojuglone derivative pentoside 2; **23**= Kaempferol-3-glucoside; **24**= Quercetin-3-arabinopyranoside; **25**= Quercetin-3-arabinofuranoside; **26**= Quercetin-3-rhamnoside; **27**= Kaempferol-3-pentoside 1; **28**= Dihydrokaempferol pentoside 1; **29**= Dihydrokaempferol pentoside 2; **30**= Kaempferol-3-pentoside 2; **31**= Kaempferol-3-rhamnoside; **32**= Caffeic acid hexoside derivative; **33**= *p*-Coumaric acid hexoside derivative 2; **34**= Hydrojuglone dihexoside derivative; **35**=1,4-naphthoquinone and hydrojuglone; **36**= Juglone (5-hydroxy-1,4-naphthoquinone)

**Figure S2.** Full scan on a HPLC-MS, and the phenolic compounds identified for *J. regia* side roots.

RT: 5.97 - 29.99

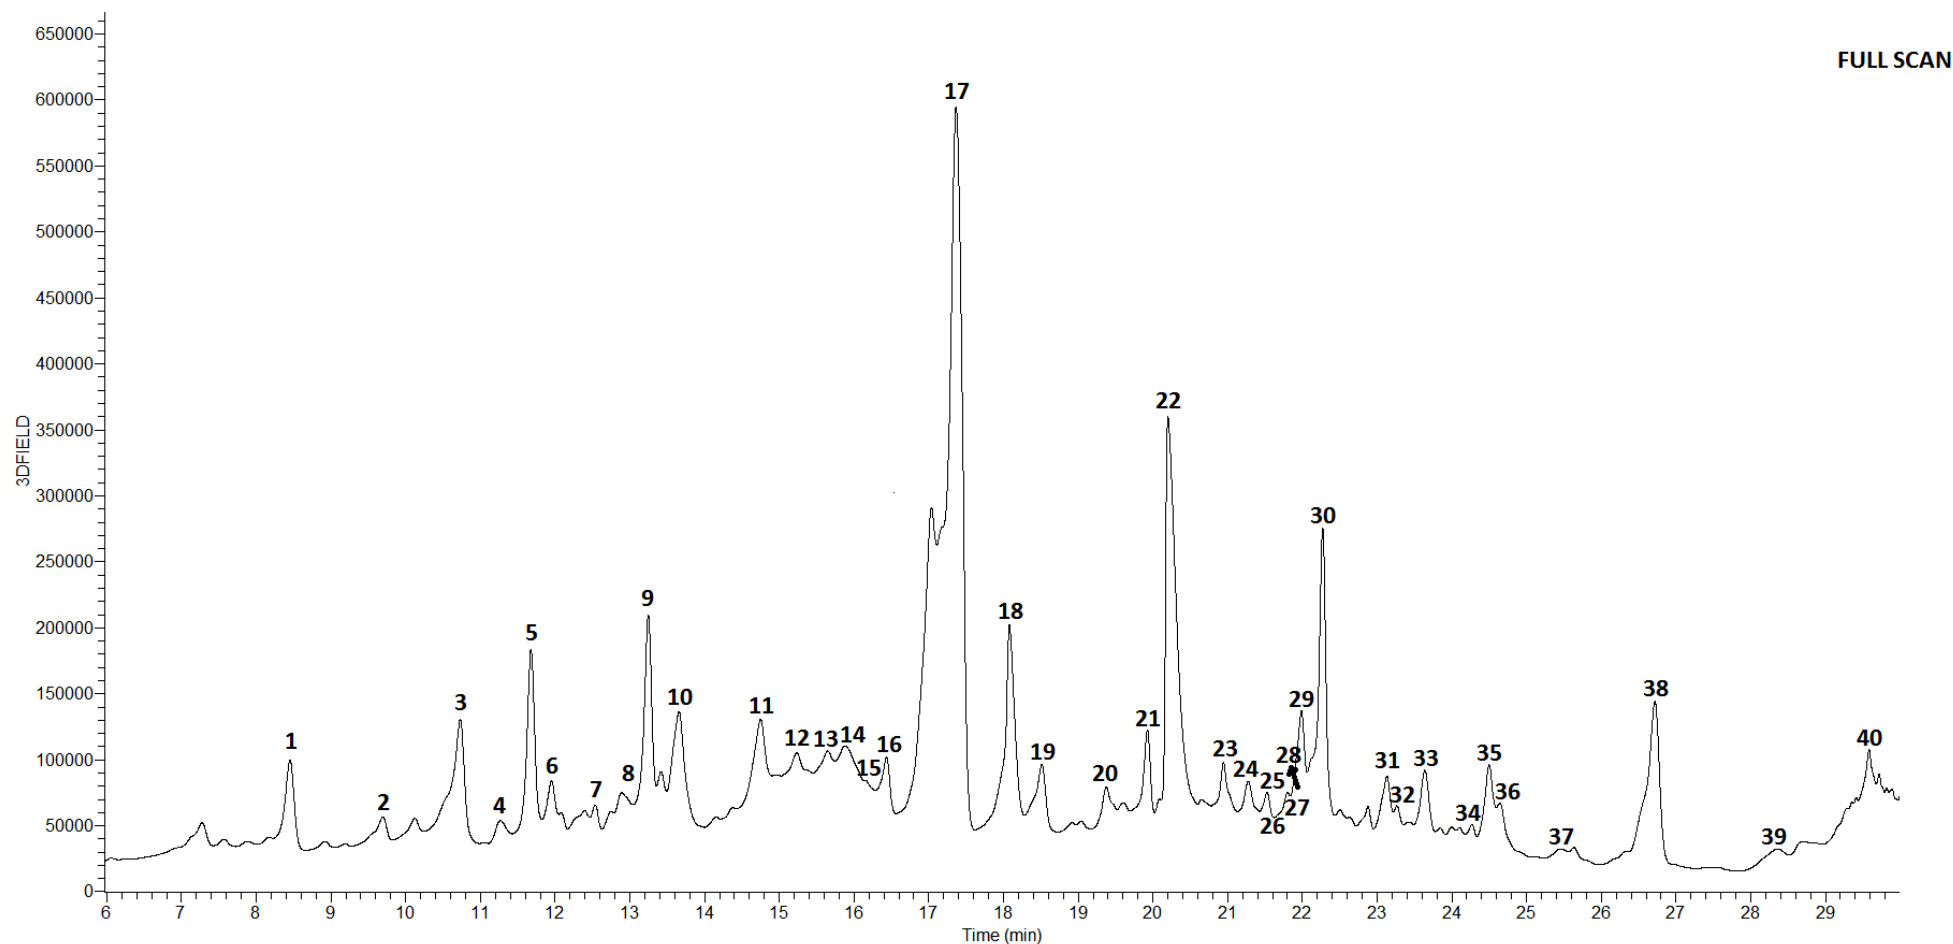

1= bis-HHDP-glucose 1 ; 2=1-*O*-(4-Hydroxy-3,5-dimethoxybenzoyl) -D-glucopyranoside; 3= bis-HHDP-glucose 2; 4= Gallic acid derivative 1; 5= Gallic acid derivative 2; 6= Ellagic acid derivative 1; 7= Tellimagrandin isomer (digalloyl-HHDP-glucose) 1; 8= Strictin/isostrictin isomer (galloyl-HHDP-glucose); 9=(+)Catechin; 10= Ellagic acid derivative 2; 11= Hydrojuglone derivative 1; 12= Ellagic acid derivative 3; 13= Ellagic acid derivative 4; 14= Ellagic acid derivative 5; 15= Tellimagrandin isomer (digalloyl-HHDP-glucose) 2; 16= Trigalloyl-glucose isomer; 17= Hydrojuglone- $\beta$ -D-glucopyranoside; 18= Ellagic acid pentoside; 19= Gallic acid derivative 6; 20= Tetralone hexoside; 21= Gallic acid derivative 7; 22= Ellagic acid; 23= Gallic acid derivative 8; 24= Digalloylgallate; 25= Gallic acid derivative 9; 26= Hydrojuglone derivative rhamnoside; 27= Gallic acid derivative 10; 28= Hydrojuglone derivative pentoside 2; 29=3-*O*-Methylellagic acid-4-*O*- $\beta$ -D-arabinopyranoside; 30= Gallic acid derivative 11; 31= *p*-Coumaric acid hexoside derivative1; 32= Gallic acid derivative 12; 33=1- $\beta$ -D-Glucopyranosyloxy-4,8-dihydroxy-2-naphthoic acid; 34=1,4,8-trihydroxynaphthalene-1-D-glucopyranoside; 35= Isofraxidin; 36= Isofraxidin derivative; 37= Hydrojuglone derivative 5; 38= Hydrojuglone derivative 6; 39=1,4-naphthoquinone and hydrojuglone; 40= Juglone (5-hydroxy-1,4-naphthoquinone)

**Figure S3.** Full scan on a HPLC-MS, and the phenolic compounds identified for *J. regia* buds.

RT: 6.03 - 30.00

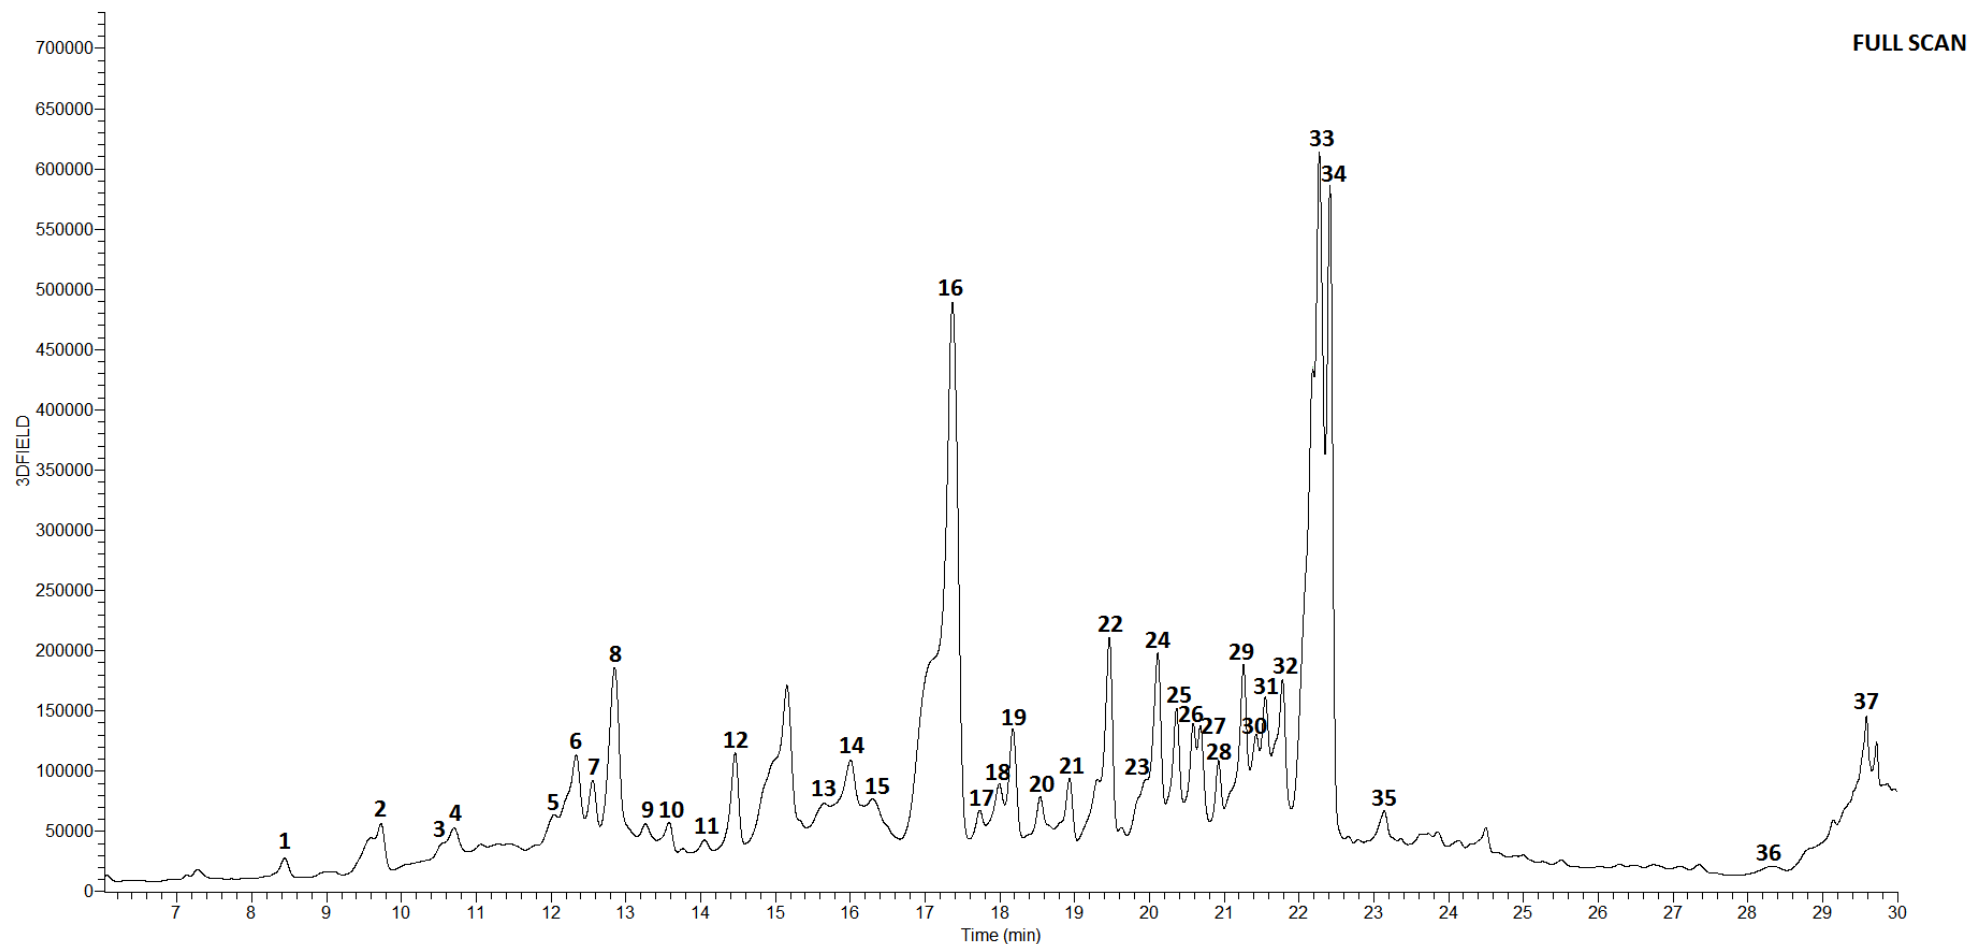

1= Epigallocatechin; 2= Neochlorogenic acid (3-caffeoylquinic acid); 3= bis-HHDP-glucose 2; 4=(epi)Catechin isomer; 5= Procyanidin dimer 3; 6=3-*p*-Coumaroylquinic acid; 7= Cryptochlorogenic acid (4-caffeoylquinic acid); 8=(+)-Catechin; 9= Dihydroxytetralone hexoside; 10= Hydrojuglone derivative 1; 11= Chlorogenic acid (5-caffeoylquinic acid); 12= Hydrojuglone dihexoside; 13= Ellagic acid derivative 5; 14= *p*-Coumaroylquinic acid; 15= Myricetin galloyl hexoside; 16= Hydrojuglone- $\beta$ -D-glucopyranoside; 17= Myricetin-3-galactoside; 18= Hydrojuglone derivative 2; 19= Hydrojuglone derivative 3; 20= Gallic acid derivative 4; 21= Quercetin galloyl hexoside; 22= Tetralone hexoside; 23= Gallic acid derivative 7; 24= Myricetin-3-rhamnoside; 25= Quercetin-3-galactoside; 26= Quercetin-3-glucoside; 27=(epi)Catechin galloyl; 28= Trihydroxytetralone galloyl hexoside; 29= Hydrojuglone derivative rhamnoside; 30= Gallic acid derivative 10; 31= Hydrojuglone derivative pentoside 2; 32= Quercetin-3-arabinopyranoside; 33= Gallic acid derivative 11; 34= Quercetin-3-rhamnoside; 35= *p*-Coumaric acid hexoside derivative 1; 36=1,4-naphthoquinone and hydrojuglone; 37= Juglone (5-hydroxy-1,4-naphthoquinone)

**Figure S4.** Full scan on a HPLC-MS, and the phenolic compounds identified for *J. regia* one-year old bark.

RT: 5.95 - 29.97

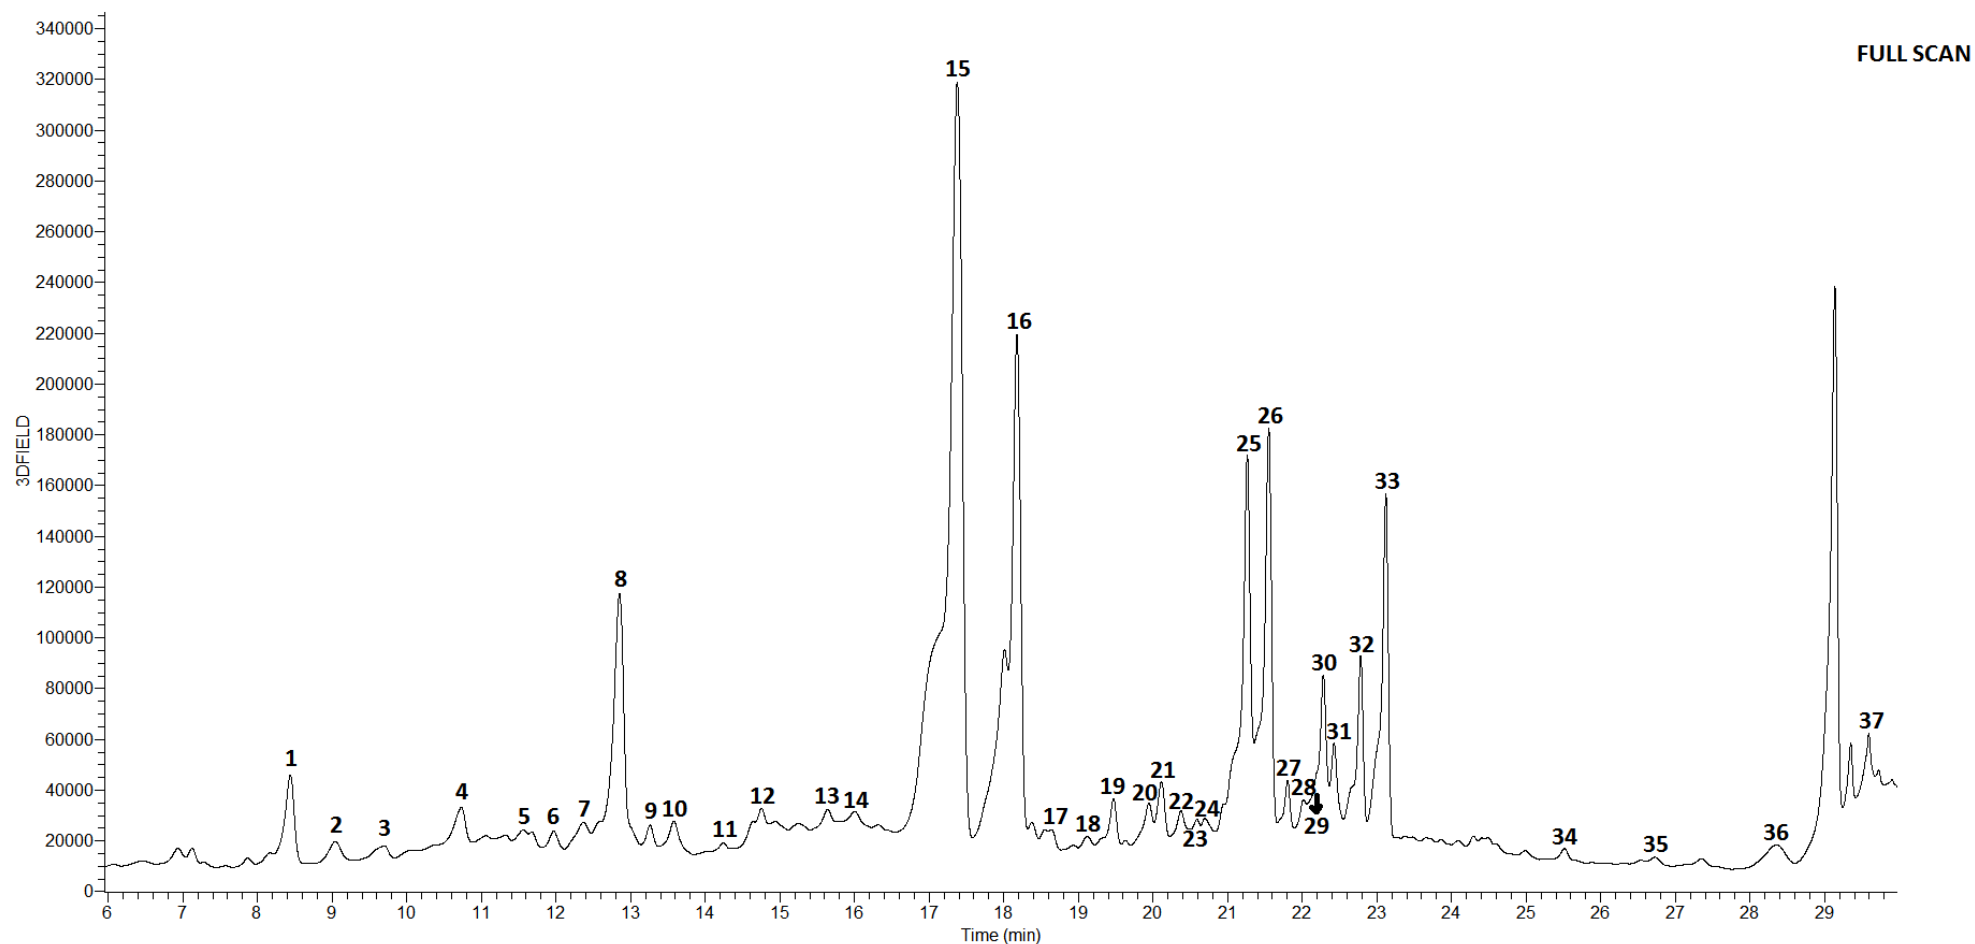

1= Epigallocatechin; 2=(epi)Catechin derivative 1; 3=1-*O*-(4-Hydroxy-3,5-dimethoxybenzoyl) -D-glucopyranoside; 4= bis-HHDP-glucose 2; 5= Gallic acid derivative 3; 6= Procyanidin dimer 3; 7= Strictin/isostrictin isomer (galloyl-HHDP-glucose); 8=(+)-Catechin; 9= Dihydroxytetralone hexoside; 10= Hydrojuglone derivative 1; 11=(epi)Catechin dihexoside; 12= Ellagic acid derivative 3; 13= Ellagic acid derivative 5; 14= *p*-Coumaroylquinic acid; 15= Hydrojuglone- $\beta$ -D-glucopyranoside; 16= Hydrojuglone derivative 3; 17= Gallic acid derivative 5; 18= Hydrojuglone derivative 4; 19= Tetralone hexoside; 20= Gallic acid derivative 7; 21= Myricetin-3-rhamnoside; 22= Quercetin-3-galactoside; 23= Ellagic acid; 24=(epi)Catechin galloyl; 25= Hydrojuglone derivative rhamnoside; 26= Hydrojuglone derivative pentoside 2; 27= Quercetin-3-arabinopyranoside; 28= Gallic acid derivative 10; 29=3-*O*-Methylellagic acid-4-*O*- $\beta$ -D-arabinopyranoside; 30= Gallic acid derivative 11; 31= Quercetin-3-rhamnoside; 32= Kaempferol-7-hexoside 1; 33= Kaempferol-7-hexoside 2; 34= Hydrojuglone derivative 5; 35= Hydrojuglone derivative 6; 36=1,4-naphthoquinone and hydrojuglone; 37= Juglone (5-hydroxy-1,4-naphthoquinone)

**Figure S5.** Full scan on a HPLC-MS, and the phenolic compounds identified for *J. regia* petiole.

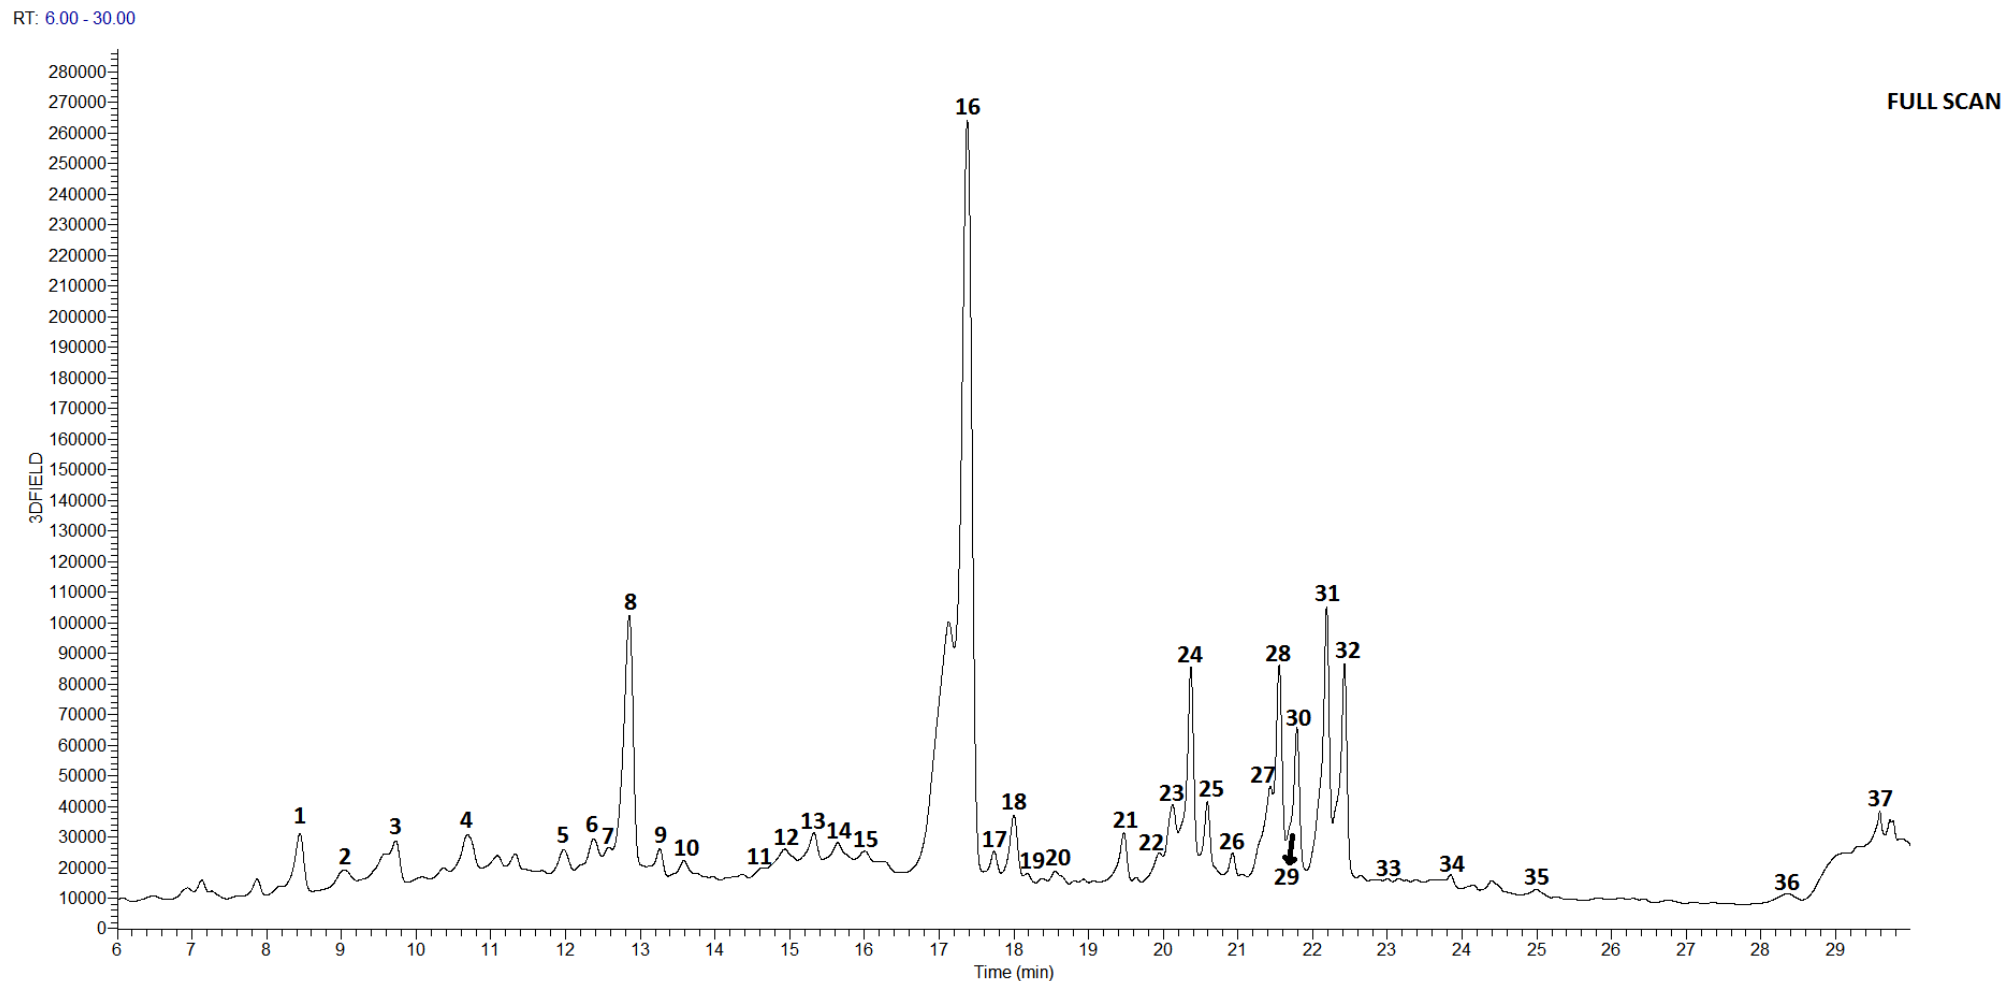

1= Epigallocatechin; 2= Procyanidin dimer 1; 3= Neochlorogenic acid (3-caffeoylquinic acid); 4= Procyanidin dimer 2; 5= Procyanidin dimer 3; 6=3-*p*-Coumaroylquinic acid; 7= Cryptochlorogenic acid (4-caffeoylquinic acid); 8=(+)Catechin; 9= Dihydroxytetralone hexoside; 10= Hydrojuglone derivative 1; 11= Hydrojuglone hexoside derivative 1; 12=5-Hydroxy-2,3-dihydro-1,4-naphthalenedione; 13=(-)Epicatechin; 14= Procyanidin dimer 4; 15= *p*-Coumaroylquinic acid; 16= Hydrojuglone- $\beta$ -D-glucopyranoside; 17= Myricetin-3-galactoside; 18= Hydrojuglone derivative 2; 19= Myricetin-3-glucoside; 20= Hydrojuglone derivative pentoside 1; 21= Tetralone hexoside; 22= Myricetin pentoside; 23= Myricetin-3-rhamnoside; 24= Quercetin-3-galactoside; 25= Quercetin-3-glucoside; 26= Trihydroxytetralone galloyl hexoside; 27= Quercetin-3-xyloside; 28= Hydrojuglone derivative pentoside 2; 29= Kaempferol-3-glucoside; 30= Quercetin-3-arabinopyranoside; 31= Quercetin-3-arabinofuranoside; 32= Quercetin-3-rhamnoside; 33= Kaempferol-3-pentoside 1; 34= Kaempferol-3-pentoside 2; 35= Caffeic acid hexoside derivative; 36=1,4-naphthoquinone and hydrojuglone; 37= Juglone (5-hydroxy-1,4-naphthoquinone)

**Figure S6.** Full scan on a HPLC-MS, and the phenolic compounds identified for *J. regia* main root.

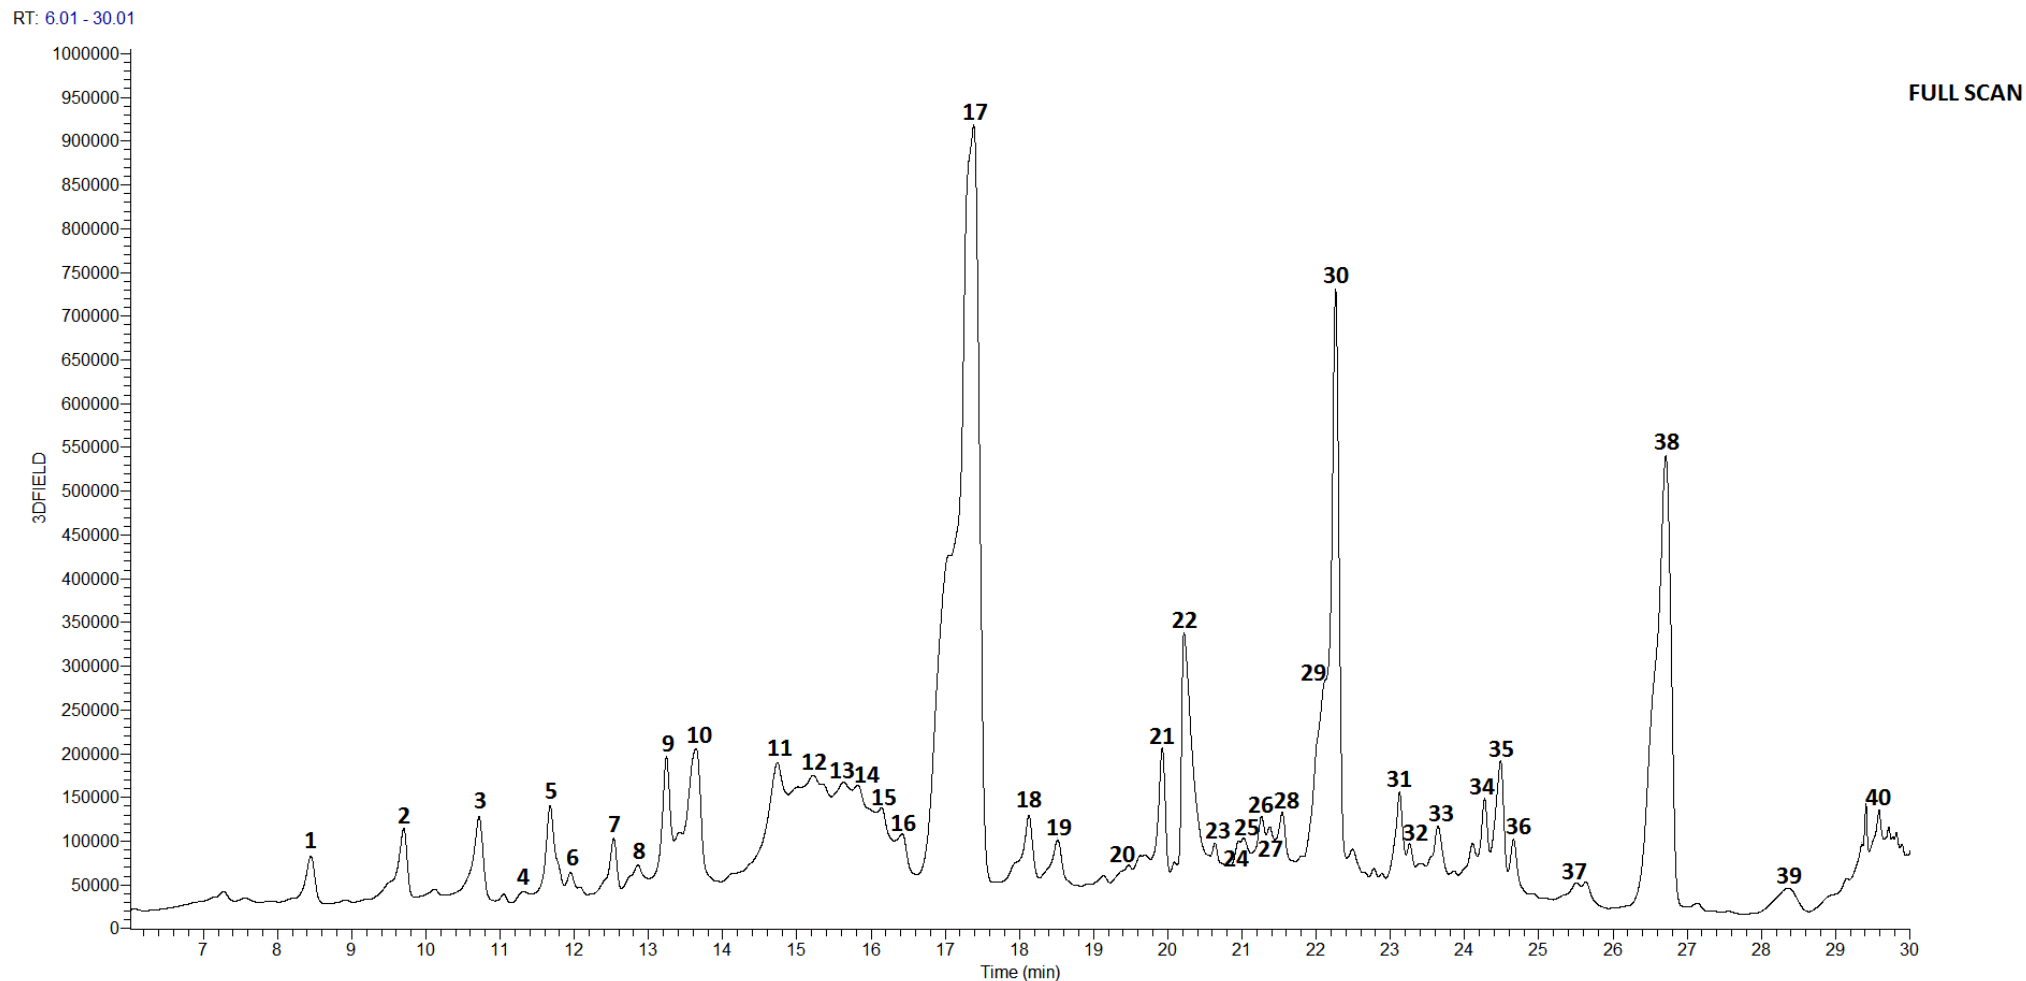

1= bis-HHDP-glucose 1 ; 2=1-*O*-(4-Hydroxy-3,5-dimethoxybenzoyl) -D-glucopyranoside; 3= bis-HHDP-glucose 2; 4= Gallic acid derivative 1; 5= Gallic acid derivative 2; 6= Ellagic acid derivative 1; 7= Tellimagrandin isomer (digalloyl-HHDP-glucose) 1; 8= Strictin/isostrictin isomer (galloyl-HHDP-glucose); 9=(+)Catechin; 10= Ellagic acid derivative 2; 11= Hydrojuglone derivative 1; 12= Ellagic acid derivative 3; 13= Ellagic acid derivative 4; 14= Ellagic acid derivative 5; 15= Tellimagrandin isomer (digalloyl-HHDP-glucose) 2; 16= Trigalloyl-glucose isomer; 17= Hydrojuglone- $\beta$ -D-glucopyranoside; 18= Ellagic acid pentoside; 19= Gallic acid derivative 6; 20= Tetralone hexoside; 21= Gallic acid derivative 7; 22= Ellagic acid; 23= Gallic acid derivative 8; 24= Digalloylgallate; 25= Gallic acid derivative 9; 26= Hydrojuglone derivative rhamnoside; 27= Gallic acid derivative 10; 28= Hydrojuglone derivative pentoside 2; 29=3-*O*-Methylellagic acid-4-*O*- $\beta$ -D-arabinopyranoside; 30= Gallic acid derivative 11; 31= *p*-Coumaric acid hexoside derivative1; 32= Gallic acid derivative 12; 33=1- $\beta$ -D-Glucopyranosyloxy-4,8-dihydroxy-2-naphthoic acid; 34=1,4,8-trihydroxynaphthalene-1-D-glucopyranoside; 35= Isofraxidin; 36= Isofraxidin derivative; 37= Hydrojuglone derivative 5; 38= Hydrojuglone derivative 6; 39=1,4-naphthoquinone and hydrojuglone; 40= Juglone (5-hydroxy-1,4-naphthoquinone)

**Figure S7.** Full scan on a HPLC-MS, and the phenolic compounds identified for *J. regia* two-year old bark.

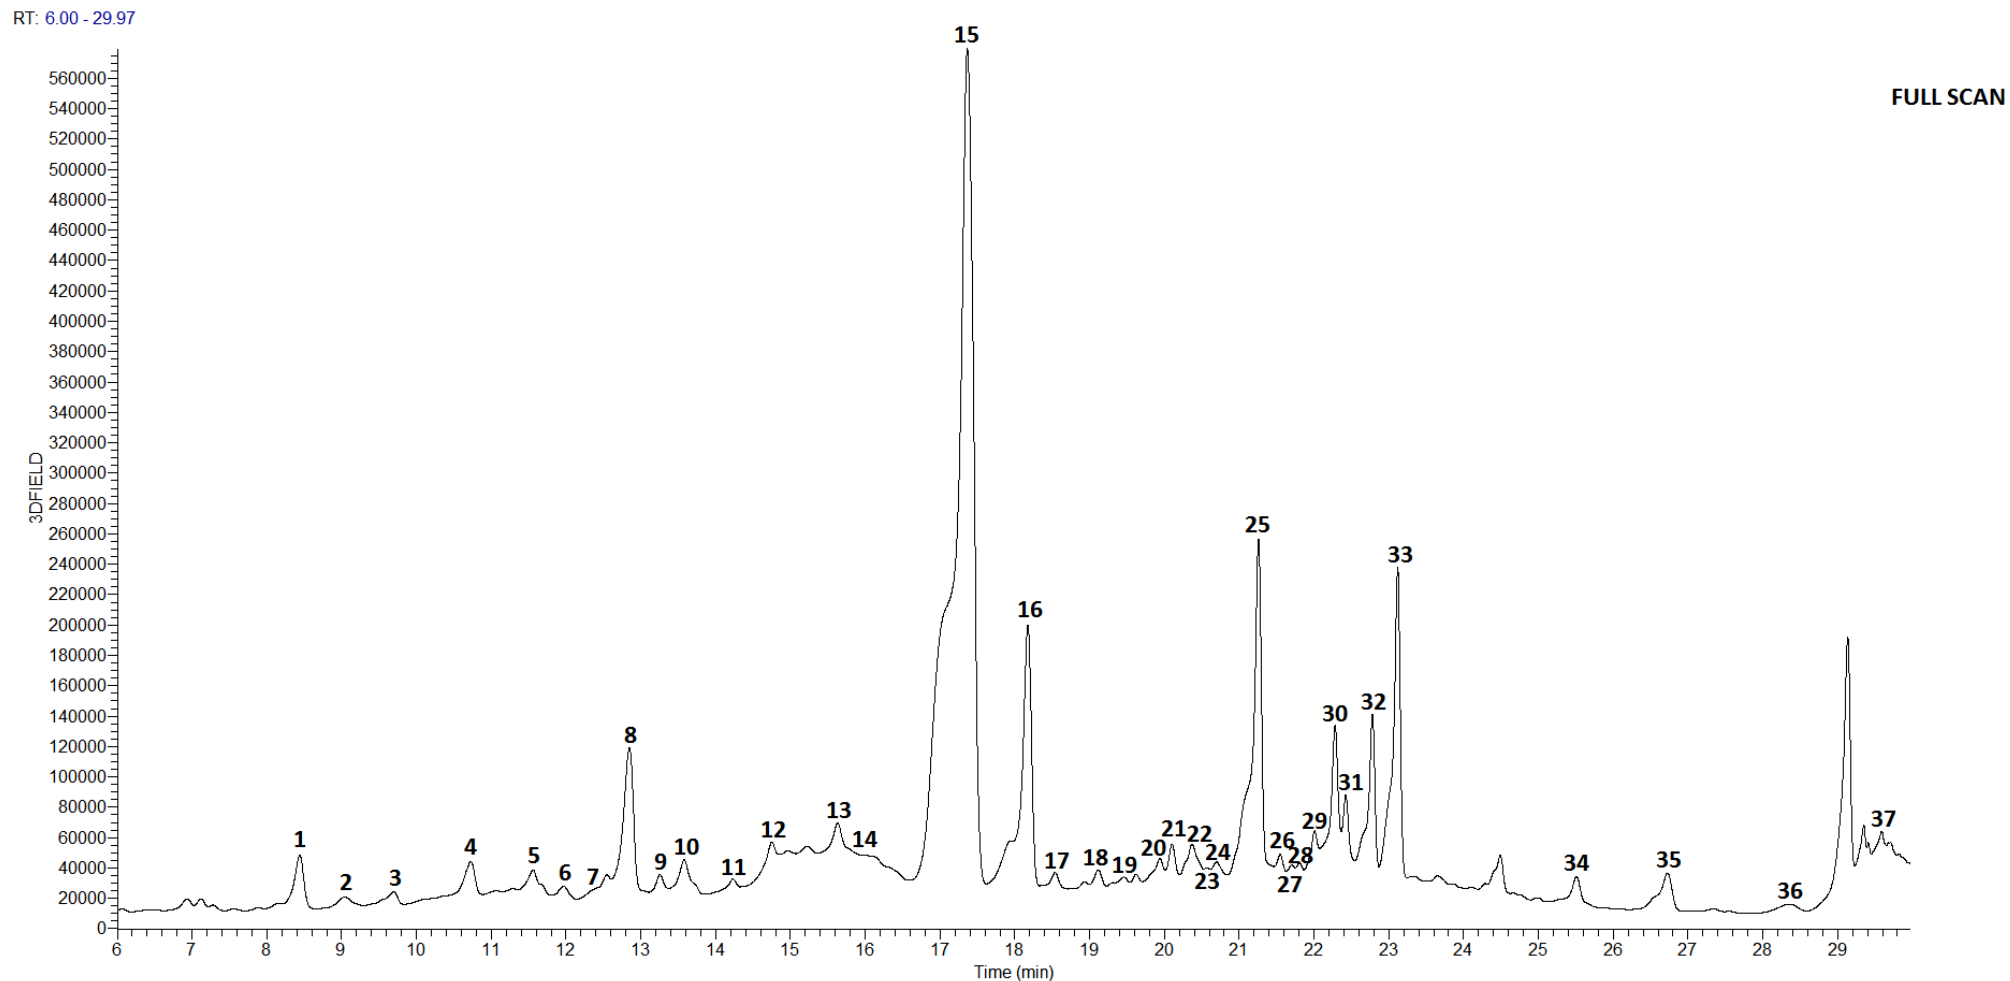

1= Epigallocatechin; 2=(epi)Catechin derivative 1; 3=1-*O*-(4-Hydroxy-3,5-dimethoxybenzoyl) -D-glucopyranoside; 4= bis-HHDP-glucose 2; 5= Gallic acid derivative 3; 6= Procyanidin dimer 3; 7= Strictin/isostrictin isomer (galloyl-HHDP-glucose); 8=(+)Catechin; 9= Dihydroxytetralone hexoside; 10= Hydrojuglone derivative 1; 11=(epi)Catechin dihexoside; 12= Ellagic acid derivative 3; 13= Ellagic acid derivative 5; 14= *p*-Coumaroylquinic acid; 15= Hydrojuglone- $\beta$ -D-glucopyranoside; 16= Hydrojuglone derivative 3; 17= Gallic acid derivative 5; 18= Hydrojuglone derivative 4; 19= Tetralone hexoside; 20= Gallic acid derivative 7; 21= Myricetin-3-rhamnoside; 22= Quercetin-3-galactoside; 23= Ellagic acid; 24=(epi)Catechin galloyl; 25= Hydrojuglone derivative rhamnoside; 26= Hydrojuglone derivative pentoside 2; 27= Quercetin-3-arabinopyranoside; 28= Gallic acid derivative 10; 29=3-*O*-Methylellagic acid-4-*O*- $\beta$ -D-arabinopyranoside; 30= Gallic acid derivative 11; 31= Quercetin-3-rhamnoside; 32= Kaempferol-7-hexoside 1; 33= Kaempferol-7-hexoside 2; 34= Hydrojuglone derivative 5; 35= Hydrojuglone derivative 6; 36=1,4-naphthoquinone and hydrojuglone; 37= Juglone (5-hydroxy-1,4-naphthoquinone)
